# Supplementary material for: The experimental average refractive index of liquid crystals and its prediction from the anisotropic indices
Source: Royal Society of Chemistry journal article supplement (doi:10.1039/d1cp04065k), 2022-01-01
Supplement: d1cp04065k1.pdf [file d1cp04065k1.pdf]

## Electronic Supplementary Information of:

### The experimental average refractive index of liquid crystals and its prediction from the anisotropic indices

Vanessa Jirón<sup>a,b</sup> and Erick Castellón<sup>a,b,\*</sup>

<sup>a</sup>Escuela de Química, Universidad de Costa Rica, San José 11501-2060, Costa Rica; <sup>b</sup>Centro de Investigación en Ciencia e Ingeniería de Materiales (CICIMA), Universidad de Costa Rica, San José 11501-2060, Costa Rica

## Contents

|                                                                                                                                                   |           |
|---------------------------------------------------------------------------------------------------------------------------------------------------|-----------|
| <b>S1 Treatment of densities and refractive indices data</b>                                                                                      | <b>S2</b> |
| S1.1 Densities . . . . .                                                                                                                          | S2        |
| S1.2 Refractive indices . . . . .                                                                                                                 | S2        |
| <b>S2 Data tables of densities and refractive indices of liquid crystals, isotropic liquids and mixtures of liquid crystal + isotropic liquid</b> | <b>S3</b> |
| S2.1 Densities . . . . .                                                                                                                          | S3        |
| S2.1.1 <i>N</i> -(4-methoxybenzylidene)-4-butylaniline (MBBA) . . . . .                                                                           | S3        |
| S2.1.2 4- <i>n</i> -pentyl-4'-cyanobiphenyl (5CB) . . . . .                                                                                       | S4        |
| S2.1.3 Benzyl alcohol . . . . .                                                                                                                   | S5        |
| S2.1.4 Cinamaldehyde . . . . .                                                                                                                    | S5        |
| S2.1.5 1-decanol . . . . .                                                                                                                        | S6        |
| S2.1.6 Glyceryl trioleate (GTO) . . . . .                                                                                                         | S6        |
| S2.1.7 2,2,4,4,6,8,8-heptamethylnonane (HMN) . . . . .                                                                                            | S7        |
| S2.1.8 1-octanol . . . . .                                                                                                                        | S7        |
| S2.1.9 2-octyl-1-dodecanol (2OD) . . . . .                                                                                                        | S8        |
| S2.1.10 1,1,2,2-tetrabromoethane (TBE) . . . . .                                                                                                  | S8        |
| S2.1.11 <i>n</i> -undecane . . . . .                                                                                                              | S9        |
| S2.1.12 1-undecanol . . . . .                                                                                                                     | S9        |
| S2.2 Refractive indices . . . . .                                                                                                                 | S10       |
| S2.2.1 Benzyl alcohol . . . . .                                                                                                                   | S10       |
| S2.2.2 Cinamaldehyde . . . . .                                                                                                                    | S11       |
| S2.2.3 1-decanol . . . . .                                                                                                                        | S12       |
| S2.2.4 Glyceryl trioleate (GTO) . . . . .                                                                                                         | S13       |
| S2.2.5 2,2,4,4,6,8,8-heptamethylnonane (HMN) . . . . .                                                                                            | S15       |
| S2.2.6 1-octanol . . . . .                                                                                                                        | S16       |
| S2.2.7 2-octyl-1-dodecanol (2OD) . . . . .                                                                                                        | S17       |
| S2.2.8 1,1,2,2-tetrabromoethane (TBE) . . . . .                                                                                                   | S19       |
| S2.2.9 <i>n</i> -undecane . . . . .                                                                                                               | S20       |
| S2.2.10 1-undecanol . . . . .                                                                                                                     | S21       |

## S1. Treatment of densities and refractive indices data

### S1.1. Densities

The densities of the organic liquids were measured with a pycnometer from 18 to 60 °C. The data were fitted to the following model:

$$\rho(T) = Ce^{-\beta(T) \cdot T}, \quad \beta(T) = b_1T + b_0, \quad (\text{S1})$$

in which  $C$ ,  $b_0$  and  $b_1$  are parameters. An example of the fit is shown in Fig. S1a for HMN.

The densities of the LC were measured with a pycnometer from 24 to 43 °C for 5CB and from 24 to 58 °C for MBBA. The data were fitted to the following model:

$$\begin{aligned} \rho_{\text{LC}}(T) &= [1 - H(T - T_{\text{NI}})] \rho_{0,\text{N}} e^{-\beta_{\text{N}}(T) \cdot T} + H(T - T_{\text{NI}}) \rho_{0,\text{I}} e^{-\beta_{\text{I}}(T) \cdot T}, \\ \beta_i(T) &= \beta_{i,1}T + \beta_{i,0}, \end{aligned} \quad (\text{S2})$$

in which  $\rho_{0,\text{N}}$  and  $\rho_{0,\text{I}}$  are parameters,  $\beta_{\text{N}}$  and  $\beta_{\text{I}}$  denote the nematic and isotropic thermal expansion coefficients, respectively, and  $H(T - T_{\text{NI}})$  is a Heaviside-like step function centred at the nematic-isotropic transition temperature  $T_{\text{NI}}$ :

$$H(T - T_{\text{NI}}) = 1 - \frac{1}{1 + e^{\lambda(T - T_{\text{NI}})}}, \quad (\text{S3})$$

with  $\lambda$  as a smoothing parameter to mark the transition from nematic to isotropic; it was fixed to  $\lambda = 6 \text{ K}^{-1}$ . The results are plotted in Fig. S2. The densities were then interpolated at the temperatures at which the refractive indices of the isotropic mixtures were measured.

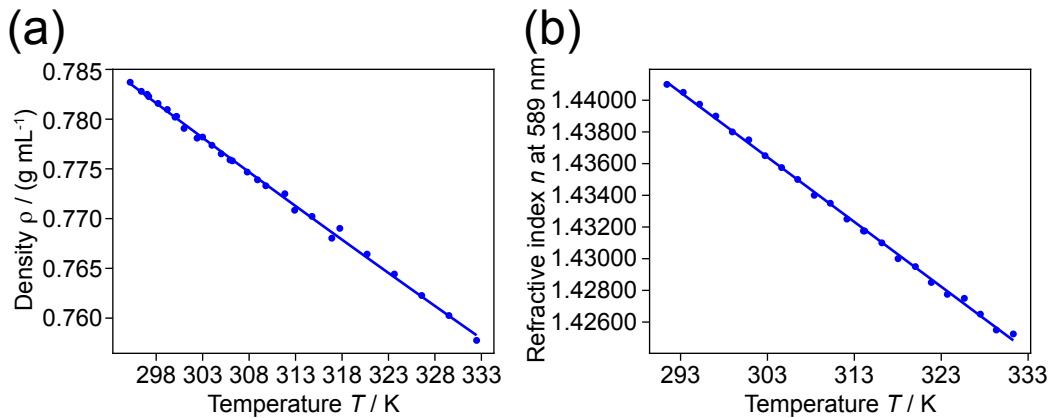

**Figure S1.** (a) Densities of HMN fitted to Eq. S1; (b) refractive indices of HMN fitted to Eq. S4.

### S1.2. Refractive indices

The refractive indices of the organic liquids were fitted to a linear model:

$$n(T) = a_1T + a_0, \quad (\text{S4})$$

in which  $a_0$  and  $a_1$  are parameters. An example of the fit appears in Fig. S1b for HMN. These data were then interpolated at the temperatures at which the refractive indices of the isotropic mixtures were measured.

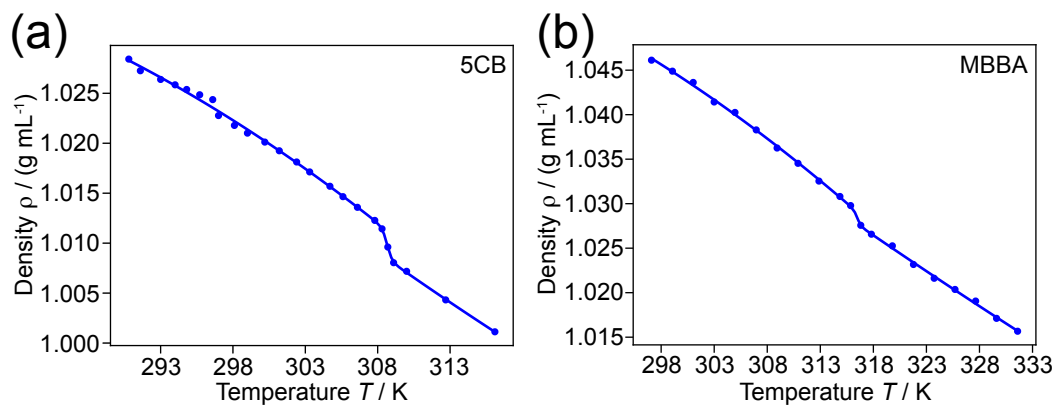

**Figure S2.** Densities of the LC (a) 5CB and (b) MBBA fitted to Eq. S2.

## S2. Data tables of densities and refractive indices of liquid crystals, isotropic liquids and mixtures of liquid crystal + isotropic liquid

### S2.1. Densities

#### S2.1.1. *N*-(4-methoxybenzylidene)-4-butylaniline (MBBA)

**Table S1.** Densities of liquid crystal MBBA.

| Temperature / °C<br>(±0.001) | Density / (g cm <sup>-3</sup> )<br>(±0.0003) |
|------------------------------|----------------------------------------------|
| 24.091                       | 1.0461                                       |
| 26.064                       | 1.0449                                       |
| 28.021                       | 1.0436                                       |
| 29.995                       | 1.0414                                       |
| 31.959                       | 1.0403                                       |
| 33.962                       | 1.0383                                       |
| 35.927                       | 1.0363                                       |
| 37.896                       | 1.0345                                       |
| 39.872                       | 1.0325                                       |
| 41.848                       | 1.0308                                       |
| 42.856                       | 1.0298                                       |
| 43.813                       | 1.0276                                       |
| 44.814                       | 1.0266                                       |
| 46.789                       | 1.0253                                       |
| 48.778                       | 1.0232                                       |
| 50.730                       | 1.0216                                       |
| 52.694                       | 1.0204                                       |
| 54.638                       | 1.0191                                       |
| 56.608                       | 1.0171                                       |
| 58.593                       | 1.0157                                       |

S2.1.2. 4-*n*-pentyl-4'-cyanobiphenyl (5CB)

**Table S2.** Densities of liquid crystal 5CB.

| Temperature / °C<br>(±0.1) | Density / (g cm <sup>-3</sup> )<br>(±0.0004) |
|----------------------------|----------------------------------------------|
| 24.0                       | 1.0233                                       |
| 26.4                       | 1.0211                                       |
| 27.6                       | 1.0200                                       |
| 29.6                       | 1.0184                                       |
| 31.5                       | 1.0163                                       |
| 32.4                       | 1.0153                                       |
| 33.0                       | 1.0147                                       |
| 34.1                       | 1.0134                                       |
| 35.0                       | 1.0121                                       |
| 35.6                       | 1.0106                                       |
| 35.8                       | 1.0089                                       |
| 37.0                       | 1.0071                                       |
| 39.6                       | 1.0045                                       |
| 40.4                       | 1.0034                                       |
| 43.0                       | 1.0019                                       |
| 24.0                       | 1.0233                                       |
| 26.4                       | 1.0211                                       |
| 27.6                       | 1.0200                                       |
| 29.6                       | 1.0184                                       |
| 31.5                       | 1.0163                                       |
| 32.4                       | 1.0153                                       |
| 33.0                       | 1.0147                                       |
| 34.1                       | 1.0134                                       |
| 35.0                       | 1.0121                                       |
| 35.6                       | 1.0106                                       |
| 35.8                       | 1.0089                                       |
| 37.0                       | 1.0071                                       |
| 39.6                       | 1.0045                                       |
| 40.4                       | 1.0034                                       |
| 43.0                       | 1.0019                                       |
| 17.8                       | 1.0284                                       |
| 18.6                       | 1.0273                                       |
| 20.0                       | 1.0264                                       |
| 21.0                       | 1.0258                                       |
| 21.8                       | 1.0254                                       |
| 22.7                       | 1.0249                                       |
| 23.6                       | 1.0244                                       |
| 24.0                       | 1.0228                                       |
| 25.1                       | 1.0218                                       |
| 26.0                       | 1.0210                                       |
| 27.2                       | 1.0201                                       |
| 28.2                       | 1.0192                                       |
| 29.4                       | 1.0181                                       |
| 30.3                       | 1.0171                                       |
| 31.7                       | 1.0157                                       |
| 32.6                       | 1.0147                                       |

**Table S2 continued from previous page**

| Temperature / °C<br>(±0.1) | Density / (g cm <sup>-3</sup> )<br>(±0.0004) |
|----------------------------|----------------------------------------------|
| 33.6                       | 1.0136                                       |
| 34.8                       | 1.0123                                       |
| 35.3                       | 1.0114                                       |
| 35.7                       | 1.0096                                       |
| 36.1                       | 1.0080                                       |
| 37.0                       | 1.0072                                       |
| 39.7                       | 1.0043                                       |
| 43.1                       | 1.0011                                       |

*S2.1.3. Benzyl alcohol***Table S3.** Densities of benzyl alcohol.

| Temperature / °C<br>(±0.1) | Density / (g cm <sup>-3</sup> )<br>(±0.0004) |
|----------------------------|----------------------------------------------|
| 24.0                       | 1.0427                                       |
| 24.8                       | 1.0426                                       |
| 26.0                       | 1.0417                                       |
| 26.8                       | 1.0409                                       |
| 28.2                       | 1.0398                                       |
| 29.0                       | 1.0392                                       |
| 30.1                       | 1.0379                                       |
| 30.8                       | 1.0373                                       |
| 31.6                       | 1.0368                                       |
| 32.6                       | 1.0358                                       |
| 34.5                       | 1.0345                                       |
| 36.0                       | 1.0334                                       |
| 37.0                       | 1.0325                                       |
| 41.9                       | 1.0285                                       |

*S2.1.4. Cinamaldehyde***Table S4.** Densities of cinamaldehyde.

| Temperature / °C<br>(±0.1) | Density / (g cm <sup>-3</sup> )<br>(±0.0004) |
|----------------------------|----------------------------------------------|
| 22.8                       | 1.0532                                       |
| 24.2                       | 1.0517                                       |
| 25.6                       | 1.0509                                       |
| 26.7                       | 1.0499                                       |
| 27.6                       | 1.0493                                       |
| 28.6                       | 1.0482                                       |
| 29.6                       | 1.0476                                       |
| 30.6                       | 1.0467                                       |

**Table S4 continued from previous page**

| Temperature / °C<br>(±0.1) | Density / (g cm <sup>-3</sup> )<br>(±0.0004) |
|----------------------------|----------------------------------------------|
| 31.6                       | 1.0459                                       |
| 32.7                       | 1.0448                                       |
| 34.6                       | 1.0438                                       |
| 36.6                       | 1.0420                                       |
| 38.5                       | 1.0403                                       |
| 40.3                       | 1.0384                                       |
| 42.5                       | 1.0367                                       |
| 42.9                       | 1.0354                                       |

*S2.1.5. 1-decanol***Table S5.** Densities of 1-decanol.

| Temperature / °C<br>(±0.1) | Density / (g cm <sup>-3</sup> )<br>(±0.0003) |
|----------------------------|----------------------------------------------|
| 21.8                       | 0.8292                                       |
| 22.6                       | 0.8283                                       |
| 23.8                       | 0.8273                                       |
| 25.0                       | 0.8266                                       |
| 26.4                       | 0.8257                                       |
| 27.4                       | 0.8251                                       |
| 28.2                       | 0.8245                                       |
| 29.6                       | 0.8236                                       |
| 31.0                       | 0.8224                                       |
| 32.1                       | 0.8219                                       |
| 33.4                       | 0.8210                                       |
| 34.7                       | 0.8202                                       |
| 35.9                       | 0.8193                                       |
| 40.2                       | 0.8156                                       |
| 43.3                       | 0.8128                                       |

*S2.1.6. Glyceryl trioleate (GTO)***Table S6.** Densities of GTO.

| Temperature / °C<br>(±0.1) | Density / (g cm <sup>-3</sup> )<br>(±0.0003) |
|----------------------------|----------------------------------------------|
| 24.103                     | 0.9106                                       |
| 27.044                     | 0.9085                                       |
| 30.019                     | 0.9063                                       |
| 32.958                     | 0.9045                                       |
| 35.916                     | 0.9024                                       |
| 38.864                     | 0.9003                                       |
| 41.834                     | 0.8983                                       |

**Table S6 continued from previous page**

| Temperature / °C<br>(±0.1) | Density / (g cm <sup>-3</sup> )<br>(±0.0003) |
|----------------------------|----------------------------------------------|
| 44.796                     | 0.8964                                       |
| 47.730                     | 0.8943                                       |
| 50.675                     | 0.8925                                       |
| 53.537                     | 0.8905                                       |
| 56.617                     | 0.8889                                       |

*S2.1.7. 2,2,4,4,6,8,8-heptamethylnonane (HMN)***Table S7.** Densities of HMN.

| Temperature / °C<br>(±0.1) | Density / (g cm <sup>-3</sup> )<br>(±0.0002) |
|----------------------------|----------------------------------------------|
| 22.2                       | 0.7837                                       |
| 23.4                       | 0.7828                                       |
| 24.2                       | 0.7823                                       |
| 25.2                       | 0.7816                                       |
| 26.2                       | 0.7810                                       |
| 27.2                       | 0.7803                                       |
| 28.0                       | 0.7791                                       |
| 29.4                       | 0.7781                                       |
| 31.0                       | 0.7774                                       |
| 32.0                       | 0.7765                                       |
| 33.2                       | 0.7758                                       |
| 34.8                       | 0.7747                                       |
| 36.8                       | 0.7733                                       |
| 39.9                       | 0.7708                                       |
| 43.9                       | 0.7680                                       |

*S2.1.8. 1-octanol***Table S8.** Densities of 1-octanol.

| Temperature / °C<br>(±0.1) | Density / (g cm <sup>-3</sup> )<br>(±0.0003) |
|----------------------------|----------------------------------------------|
| 23.2                       | 0.8251                                       |
| 24.2                       | 0.8239                                       |
| 25.2                       | 0.8233                                       |
| 26.2                       | 0.8224                                       |
| 27.2                       | 0.8219                                       |
| 28.2                       | 0.8212                                       |
| 29.2                       | 0.8204                                       |
| 30.0                       | 0.8196                                       |
| 32.3                       | 0.8186                                       |
| 31.2                       | 0.8178                                       |

**Table S8 continued from previous page**

| Temperature / °C<br>(±0.1) | Density / (g cm <sup>-3</sup> )<br>(±0.0003) |
|----------------------------|----------------------------------------------|
| 32.3                       | 0.8171                                       |
| 34.4                       | 0.8163                                       |
| 35.3                       | 0.8157                                       |
| 36.4                       | 0.8146                                       |
| 38.5                       | 0.8128                                       |
| 41.2                       | 0.8111                                       |
| 44.1                       | 0.8097                                       |

*S2.1.9. 2-octyl-1-dodecanol (2OD)***Table S9.** Densities of 2OD.

| Temperature / °C<br>(±0.1) | Density / (g cm <sup>-3</sup> )<br>(±0.0003) |
|----------------------------|----------------------------------------------|
| 22.6                       | 0.8388                                       |
| 23.6                       | 0.8379                                       |
| 24.6                       | 0.8373                                       |
| 25.8                       | 0.8364                                       |
| 26.8                       | 0.8359                                       |
| 27.5                       | 0.8354                                       |
| 28.7                       | 0.8342                                       |
| 29.8                       | 0.8340                                       |
| 31.0                       | 0.8329                                       |
| 32.0                       | 0.8324                                       |
| 33.0                       | 0.8320                                       |
| 34.0                       | 0.8310                                       |
| 35.0                       | 0.8308                                       |
| 36.2                       | 0.8300                                       |
| 38.5                       | 0.8274                                       |
| 40.4                       | 0.8264                                       |
| 43.2                       | 0.8248                                       |

*S2.1.10. 1,1,2,2-tetrabromoethane (TBE)***Table S10.** Densities of TBE.

| Temperature / °C<br>(±0.1) | Density / (g cm <sup>-3</sup> )<br>(±0.003) |
|----------------------------|---------------------------------------------|
| 23.0                       | 2.960                                       |
| 24.0                       | 2.957                                       |
| 25.0                       | 2.955                                       |
| 26.0                       | 2.953                                       |
| 27.2                       | 2.950                                       |
| 28.1                       | 2.948                                       |



**Table S10** continued from previous page

| Temperature / °C<br>(±0.1) | Density / (g cm <sup>-3</sup> )<br>(±0.003) |
|----------------------------|---------------------------------------------|
| 29.0                       | 2.946                                       |
| 30.0                       | 2.944                                       |
| 31.0                       | 2.942                                       |
| 32.0                       | 2.940                                       |
| 33.0                       | 2.937                                       |
| 34.0                       | 2.935                                       |
| 35.0                       | 2.931                                       |
| 36.0                       | 2.930                                       |
| 38.8                       | 2.922                                       |
| 41.5                       | 2.916                                       |

*S2.1.11. n-undecane***Table S11.** Densities of *n*-undecane.

| Temperature / °C<br>(±0.1) | Density / (g cm <sup>-3</sup> )<br>(±0.0002) |
|----------------------------|----------------------------------------------|
| 22.8                       | 0.7397                                       |
| 23.6                       | 0.7391                                       |
| 24.7                       | 0.7378                                       |
| 25.8                       | 0.7371                                       |
| 26.8                       | 0.7363                                       |
| 27.7                       | 0.7355                                       |
| 28.6                       | 0.7349                                       |
| 29.6                       | 0.7341                                       |
| 30.7                       | 0.7333                                       |
| 31.7                       | 0.7324                                       |
| 32.6                       | 0.7318                                       |
| 33.8                       | 0.7307                                       |
| 35.0                       | 0.7296                                       |
| 36.0                       | 0.7291                                       |
| 38.1                       | 0.7272                                       |
| 41.3                       | 0.7249                                       |
| 43.2                       | 0.7236                                       |

*S2.1.12. 1-undecanol***Table S12.** Densities of 1-undecanol.

| Temperature / °C<br>(±0.1) | Density / (g cm <sup>-3</sup> )<br>(±0.0003) |
|----------------------------|----------------------------------------------|
| 21.0                       | 0.8338                                       |
| 22.0                       | 0.8332                                       |
| 23.0                       | 0.8325                                       |

**Table S12 continued from previous page**

| Temperature / °C<br>(±0.1) | Density / (g cm <sup>-3</sup> )<br>(±0.0003) |
|----------------------------|----------------------------------------------|
| 24.0                       | 0.8318                                       |
| 26.0                       | 0.8302                                       |
| 27.4                       | 0.8292                                       |
| 28.1                       | 0.8287                                       |
| 29.6                       | 0.8276                                       |
| 30.6                       | 0.8272                                       |
| 31.4                       | 0.8265                                       |
| 32.6                       | 0.8256                                       |
| 33.2                       | 0.8255                                       |
| 34.6                       | 0.8245                                       |
| 35.2                       | 0.8239                                       |
| 36.2                       | 0.8233                                       |
| 41.6                       | 0.8193                                       |
| 44.6                       | 0.8168                                       |

## S2.2. Refractive indices

### S2.2.1. Benzyl alcohol

**Table S13.** Refractive indices at 589 nm of benzyl alcohol.

| Temperature / °C<br>(±0.001) | Refractive index at<br>589 nm (±0.00001) |
|------------------------------|------------------------------------------|
| 18.829                       | 1.53825                                  |
| 20.641                       | 1.53750                                  |
| 22.457                       | 1.53675                                  |
| 24.291                       | 1.53600                                  |
| 26.169                       | 1.53525                                  |
| 28.033                       | 1.53450                                  |
| 29.923                       | 1.53375                                  |
| 31.781                       | 1.53275                                  |
| 33.644                       | 1.53175                                  |
| 35.508                       | 1.53050                                  |
| 37.360                       | 1.52950                                  |
| 39.132                       | 1.52900                                  |
| 41.037                       | 1.52850                                  |
| 42.851                       | 1.52750                                  |

**Table S14.** Refractive indices at 589 nm of a mixture of 5CB + benzyl alcohol ( $x_{5CB} = 0.7594$ ).

| Temperature / °C<br>(±0.001) | Refractive index at<br>589 nm (±0.00001) |
|------------------------------|------------------------------------------|
| 18.895                       | 1.58800                                  |
| 20.609                       | 1.58750                                  |

**Table S14 continued from previous page**

| Temperature / °C<br>(±0.001) | Refractive index at<br>589 nm (±0.00001) |
|------------------------------|------------------------------------------|
| 22.394                       | 1.58650                                  |
| 24.239                       | 1.58550                                  |
| 26.109                       | 1.58450                                  |
| 27.951                       | 1.58375                                  |
| 29.778                       | 1.58300                                  |
| 31.670                       | 1.58200                                  |
| 33.461                       | 1.58125                                  |
| 35.291                       | 1.58050                                  |
| 37.207                       | 1.57950                                  |
| 38.970                       | 1.57875                                  |
| 40.785                       | 1.57800                                  |
| 42.616                       | 1.57700                                  |

*S2.2.2. Cinamaldehyde***Table S15.** Refractive indices at 589 nm of cinamaldehyde.

| Temperature / °C<br>(±0.001) | Refractive index at<br>589 nm (±0.00001) |
|------------------------------|------------------------------------------|
| 18.878                       | 1.62350                                  |
| 20.624                       | 1.62275                                  |
| 22.485                       | 1.62175                                  |
| 24.361                       | 1.61950                                  |
| 26.163                       | 1.61850                                  |
| 27.999                       | 1.61900                                  |
| 29.849                       | 1.61800                                  |
| 31.715                       | 1.61750                                  |
| 33.494                       | 1.61650                                  |
| 35.355                       | 1.61575                                  |
| 37.207                       | 1.61450                                  |
| 39.029                       | 1.61400                                  |
| 40.868                       | 1.61275                                  |
| 42.755                       | 1.61150                                  |

**Table S16.** Refractive indices at 589 nm of a mixture of 5CB + cinamaldehyde ( $x_{5CB} = 0.7948$ ).

| Temperature / °C<br>(±0.001) | Refractive index at<br>589 nm (±0.00001) |
|------------------------------|------------------------------------------|
| 18.699                       | 1.59825                                  |
| 20.500                       | 1.59750                                  |
| 22.339                       | 1.59650                                  |
| 24.195                       | 1.59550                                  |
| 26.056                       | 1.59500                                  |
| 27.890                       | 1.59375                                  |

**Table S16 continued from previous page**

| Temperature / °C<br>(±0.001) | Refractive index at<br>589 nm (±0.00001) |
|------------------------------|------------------------------------------|
| 29.715                       | 1.59275                                  |
| 31.641                       | 1.59175                                  |
| 33.494                       | 1.59100                                  |
| 35.354                       | 1.59000                                  |
| 37.112                       | 1.58900                                  |
| 38.950                       | 1.58825                                  |
| 40.842                       | 1.58750                                  |
| 42.600                       | 1.58625                                  |

*S2.2.3. 1-decanol***Table S17.** Refractive indices at 589 nm of 1-decanol.

| Temperature / °C<br>(±0.01) | Refractive index at<br>589 nm (±0.00001) |
|-----------------------------|------------------------------------------|
| 20.360                      | 1.43900                                  |
| 22.180                      | 1.43800                                  |
| 24.000                      | 1.43750                                  |
| 25.820                      | 1.43650                                  |
| 27.650                      | 1.43600                                  |
| 29.520                      | 1.43525                                  |
| 31.360                      | 1.43450                                  |
| 33.230                      | 1.43375                                  |
| 35.030                      | 1.43300                                  |
| 36.920                      | 1.43225                                  |
| 38.670                      | 1.43150                                  |
| 40.700                      | 1.43075                                  |
| 39.320                      | 1.43050                                  |
| 41.227                      | 1.42950                                  |
| 43.105                      | 1.42900                                  |
| 44.917                      | 1.42800                                  |
| 46.866                      | 1.42750                                  |
| 48.728                      | 1.42650                                  |
| 50.676                      | 1.42575                                  |
| 52.494                      | 1.42500                                  |
| 54.454                      | 1.42450                                  |
| 56.334                      | 1.42350                                  |

**Table S18.** Refractive indices at 589 nm of a mixture of 5CB + 1-decanol ( $x_{5CB} = 0.8689$ ).

| Temperature / °C<br>(±0.01) | Refractive index at<br>589 nm (±0.00001) |
|-----------------------------|------------------------------------------|
| 20.43                       | 1.57800                                  |
| 22.24                       | 1.57725                                  |

**Table S18 continued from previous page**

| Temperature / °C<br>(±0.01) | Refractive index at<br>589 nm (±0.00001) |
|-----------------------------|------------------------------------------|
| 25.83                       | 1.57650                                  |
| 27.71                       | 1.57450                                  |
| 29.48                       | 1.57400                                  |
| 31.42                       | 1.57275                                  |
| 33.18                       | 1.57200                                  |
| 34.92                       | 1.57100                                  |
| 36.78                       | 1.57050                                  |
| 38.62                       | 1.56950                                  |
| 40.36                       | 1.56900                                  |

**Table S19.** Refractive indices at 589 nm of a mixture of MBBA + 1-decanol ( $x_{\text{MBBA}} = 0.8435$ ).

| Temperature / °C<br>(±0.001) | Refractive index at<br>589 nm (±0.00001) |
|------------------------------|------------------------------------------|
| 18.453                       | 1.60125                                  |
| 20.312                       | 1.60050                                  |
| 22.213                       | 1.59950                                  |
| 24.213                       | 1.59875                                  |
| 26.045                       | 1.59800                                  |
| 27.927                       | 1.59700                                  |
| 29.838                       | 1.59600                                  |
| 31.742                       | 1.59500                                  |
| 33.648                       | 1.59400                                  |
| 35.544                       | 1.59300                                  |
| 37.424                       | 1.59200                                  |
| 39.334                       | 1.59100                                  |
| 41.233                       | 1.59050                                  |
| 43.052                       | 1.58950                                  |
| 45.043                       | 1.58800                                  |
| 46.875                       | 1.58725                                  |
| 50.613                       | 1.58525                                  |
| 52.604                       | 1.58450                                  |
| 54.351                       | 1.58425                                  |
| 56.347                       | 1.58350                                  |

#### S2.2.4. *Glyceryl trioleate (GTO)*

**Table S20.** Refractive indices at 589 nm of GTO.

| Temperature / °C<br>(±0.001) | Refractive index at<br>589 nm (±0.00001) |
|------------------------------|------------------------------------------|
| 20.390                       | 1.46900                                  |
| 22.250                       | 1.46850                                  |
| 24.196                       | 1.46775                                  |

**Table S20 continued from previous page**

| Temperature / °C<br>(±0.001) | Refractive index at<br>589 nm (±0.00001) |
|------------------------------|------------------------------------------|
| 26.088                       | 1.46700                                  |
| 27.975                       | 1.46675                                  |
| 29.860                       | 1.46575                                  |
| 31.743                       | 1.46500                                  |
| 33.627                       | 1.46450                                  |
| 35.511                       | 1.46350                                  |
| 37.386                       | 1.46300                                  |
| 39.277                       | 1.46200                                  |
| 41.149                       | 1.46125                                  |
| 43.044                       | 1.46050                                  |
| 44.920                       | 1.46000                                  |
| 46.826                       | 1.45900                                  |
| 48.699                       | 1.45850                                  |
| 50.547                       | 1.45775                                  |
| 52.398                       | 1.45725                                  |
| 54.325                       | 1.45625                                  |
| 56.203                       | 1.45550                                  |
| 58.085                       | 1.45500                                  |

**Table S21.** Refractive indices at 589 nm of a mixture of 5CB + GTO ( $x_{5CB} = 0.9680$ ).

| Temperature / °C<br>(±0.001) | Refractive index at<br>589 nm (±0.00001) |
|------------------------------|------------------------------------------|
| 22.159                       | 1.57875                                  |
| 24.070                       | 1.57800                                  |
| 25.953                       | 1.57700                                  |
| 27.858                       | 1.57625                                  |
| 29.741                       | 1.57500                                  |
| 31.618                       | 1.57400                                  |
| 33.523                       | 1.57325                                  |
| 35.397                       | 1.57225                                  |
| 37.293                       | 1.57125                                  |
| 39.169                       | 1.57050                                  |
| 41.058                       | 1.56975                                  |
| 42.907                       | 1.56900                                  |

**Table S22.** Refractive indices at 589 nm of a mixture of MBBA + GTO ( $x_{MBBA} = 0.9544$ ).

| Temperature / °C<br>(±0.001) | Refractive index at<br>589 nm (±0.00001) |
|------------------------------|------------------------------------------|
| 20.685                       | 1.59850                                  |
| 22.490                       | 1.59750                                  |
| 24.360                       | 1.59650                                  |
| 26.194                       | 1.59550                                  |

**Table S22 continued from previous page**

| Temperature / °C<br>(±0.001) | Refractive index at<br>589 nm (±0.00001) |
|------------------------------|------------------------------------------|
| 28.089                       | 1.59450                                  |
| 29.974                       | 1.59350                                  |
| 31.865                       | 1.59275                                  |
| 33.765                       | 1.59150                                  |
| 35.646                       | 1.59050                                  |
| 37.525                       | 1.59000                                  |
| 39.383                       | 1.58900                                  |
| 41.295                       | 1.58800                                  |
| 43.180                       | 1.58700                                  |
| 45.064                       | 1.58650                                  |
| 46.896                       | 1.58500                                  |
| 48.798                       | 1.58475                                  |
| 50.660                       | 1.58375                                  |
| 52.511                       | 1.58300                                  |
| 54.370                       | 1.58225                                  |
| 56.204                       | 1.58100                                  |

*S2.2.5. 2,2,4,4,6,8,8-heptamethylnonane (HMN)***Table S23.** Refractive indices at 589 nm of HMN.

| Temperature / °C<br>(±0.001) | Refractive index at<br>589 nm (±0.00001) |
|------------------------------|------------------------------------------|
| 18.427                       | 1.44100                                  |
| 20.312                       | 1.44050                                  |
| 22.186                       | 1.43975                                  |
| 24.056                       | 1.43900                                  |
| 25.960                       | 1.43800                                  |
| 27.849                       | 1.43750                                  |
| 29.725                       | 1.43650                                  |
| 31.627                       | 1.43575                                  |
| 33.476                       | 1.43500                                  |
| 35.383                       | 1.43400                                  |
| 37.232                       | 1.43350                                  |
| 39.145                       | 1.43250                                  |
| 41.046                       | 1.43175                                  |
| 41.188                       | 1.43175                                  |
| 43.166                       | 1.43100                                  |
| 45.028                       | 1.43000                                  |
| 47.025                       | 1.42950                                  |
| 48.856                       | 1.42850                                  |
| 50.696                       | 1.42775                                  |
| 52.659                       | 1.42750                                  |
| 54.504                       | 1.42650                                  |
| 56.338                       | 1.42550                                  |
| 58.297                       | 1.42525                                  |

**Table S24.** Refractive indices at 589 nm of a mixture of 5CB + HMN ( $x_{5CB} = 0.9138$ ).

| Temperature / °C<br>( $\pm 0.001$ ) | Refractive index at<br>589 nm ( $\pm 0.00001$ ) |
|-------------------------------------|-------------------------------------------------|
| 18.516                              | 1.58050                                         |
| 20.310                              | 1.57950                                         |
| 22.168                              | 1.57875                                         |
| 24.054                              | 1.57775                                         |
| 25.929                              | 1.57700                                         |
| 27.832                              | 1.57575                                         |
| 29.759                              | 1.57500                                         |
| 31.618                              | 1.57400                                         |
| 33.526                              | 1.57300                                         |
| 35.417                              | 1.57225                                         |
| 37.333                              | 1.57150                                         |
| 39.187                              | 1.57050                                         |
| 41.076                              | 1.57000                                         |

**Table S25.** Refractive indices at 589 nm of a mixture of MBBA + HMN ( $x_{MBBA} = 0.8739$ ).

| Temperature / °C<br>( $\pm 0.001$ ) | Refractive index at<br>589 nm ( $\pm 0.00001$ ) |
|-------------------------------------|-------------------------------------------------|
| 18.587                              | 1.59800                                         |
| 20.427                              | 1.59700                                         |
| 22.288                              | 1.59600                                         |
| 24.195                              | 1.59500                                         |
| 26.098                              | 1.59400                                         |
| 28.019                              | 1.59350                                         |
| 29.903                              | 1.59225                                         |
| 31.804                              | 1.59150                                         |
| 33.687                              | 1.59050                                         |
| 35.573                              | 1.58950                                         |
| 37.450                              | 1.58850                                         |
| 39.352                              | 1.58775                                         |
| 41.155                              | 1.58650                                         |
| 43.112                              | 1.58575                                         |
| 44.972                              | 1.58500                                         |
| 46.942                              | 1.58350                                         |
| 48.734                              | 1.58300                                         |
| 50.607                              | 1.58200                                         |
| 52.604                              | 1.58150                                         |
| 54.501                              | 1.58050                                         |
| 56.409                              | 1.58000                                         |
| 58.142                              | 1.57900                                         |
| 58.297                              | 1.42525                                         |

*S2.2.6. 1-octanol*



**Table S26.** Refractive indices at 589 nm of 1-octanol.

| Temperature / °C<br>(±0.001) | Refractive index at<br>589 nm (±0.00001) |
|------------------------------|------------------------------------------|
| 18.772                       | 1.43100                                  |
| 20.562                       | 1.43000                                  |
| 22.377                       | 1.42950                                  |
| 24.196                       | 1.42900                                  |
| 26.036                       | 1.42800                                  |
| 27.853                       | 1.42725                                  |
| 29.667                       | 1.42650                                  |
| 31.487                       | 1.42550                                  |
| 33.329                       | 1.42500                                  |
| 35.086                       | 1.42400                                  |
| 36.921                       | 1.42350                                  |
| 38.732                       | 1.42250                                  |
| 40.533                       | 1.42100                                  |
| 42.413                       | 1.42050                                  |

**Table S27.** Refractive indices at 589 nm of a mixture of 5CB + 1-octanol ( $x_{5CB} = 0.6869$ ).

| Temperature / °C<br>(±0.001) | Refractive index at<br>589 nm (±0.00001) |
|------------------------------|------------------------------------------|
| 18.859                       | 1.55900                                  |
| 20.664                       | 1.55800                                  |
| 22.410                       | 1.55725                                  |
| 24.255                       | 1.55650                                  |
| 26.103                       | 1.55550                                  |
| 27.975                       | 1.55450                                  |
| 29.838                       | 1.55375                                  |
| 31.697                       | 1.55300                                  |
| 33.532                       | 1.55200                                  |
| 35.396                       | 1.55150                                  |
| 37.101                       | 1.55050                                  |
| 38.992                       | 1.54975                                  |
| 40.849                       | 1.54900                                  |
| 42.625                       | 1.54775                                  |

### S2.2.7. 2-octyl-1-dodecanol (2OD)

**Table S28.** Refractive indices at 589 nm of 2OD.

| Temperature / °C<br>(±0.001) | Refractive index at<br>589 nm (±0.00001) |
|------------------------------|------------------------------------------|
| 18.282                       | 1.45525                                  |
| 20.256                       | 1.45450                                  |
| 22.107                       | 1.45375                                  |

**Table S28** continued from previous page

| Temperature / °C<br>(±0.001) | Refractive index at<br>589 nm (±0.00001) |
|------------------------------|------------------------------------------|
| 24.038                       | 1.45300                                  |
| 25.955                       | 1.45225                                  |
| 27.774                       | 1.45150                                  |
| 29.621                       | 1.45075                                  |
| 31.538                       | 1.45000                                  |
| 33.445                       | 1.44900                                  |
| 35.401                       | 1.44850                                  |
| 37.319                       | 1.44775                                  |
| 39.236                       | 1.44600                                  |
| 41.034                       | 1.44550                                  |
| 41.257                       | 1.44600                                  |
| 43.207                       | 1.44500                                  |
| 45.082                       | 1.44450                                  |
| 46.953                       | 1.44375                                  |
| 48.893                       | 1.44300                                  |
| 50.794                       | 1.44200                                  |
| 52.703                       | 1.44125                                  |
| 54.571                       | 1.44050                                  |
| 56.426                       | 1.44000                                  |
| 58.237                       | 1.43925                                  |

**Table S29.** Refractive indices at 589 nm of a mixture of 5CB + 2OD ( $x_{5CB} = 0.8992$ ).

| Temperature / °C<br>(±0.001) | Refractive index at<br>589 nm (±0.00001) |
|------------------------------|------------------------------------------|
| 18.454                       | 1.57500                                  |
| 20.280                       | 1.57450                                  |
| 22.136                       | 1.57350                                  |
| 24.044                       | 1.57300                                  |
| 25.941                       | 1.57200                                  |
| 27.838                       | 1.57100                                  |
| 29.727                       | 1.57025                                  |
| 31.642                       | 1.56950                                  |
| 33.527                       | 1.56850                                  |
| 35.441                       | 1.56775                                  |
| 37.336                       | 1.56650                                  |
| 39.219                       | 1.56600                                  |
| 41.118                       | 1.56525                                  |

**Table S30.** Refractive indices at 589 nm of a mixture of MBBA + 2OD ( $x_{MBBA} = 0.8617$ ).

| Temperature / °C<br>(±0.001) | Refractive index at<br>589 nm (±0.00001) |
|------------------------------|------------------------------------------|
| 18.500                       | 1.59450                                  |

**Table S30 continued from previous page**

| Temperature / °C<br>(±0.001) | Refractive index at<br>589 nm (±0.00001) |
|------------------------------|------------------------------------------|
| 20.352                       | 1.59400                                  |
| 22.210                       | 1.59275                                  |
| 24.139                       | 1.59200                                  |
| 26.024                       | 1.59100                                  |
| 27.946                       | 1.59050                                  |
| 29.847                       | 1.58925                                  |
| 31.743                       | 1.58825                                  |
| 33.650                       | 1.58725                                  |
| 35.525                       | 1.58625                                  |
| 37.430                       | 1.58550                                  |
| 39.327                       | 1.58450                                  |
| 41.179                       | 1.58350                                  |
| 43.097                       | 1.58275                                  |
| 45.022                       | 1.58150                                  |
| 46.897                       | 1.58050                                  |
| 48.722                       | 1.57975                                  |
| 50.715                       | 1.57875                                  |
| 52.575                       | 1.57800                                  |
| 54.502                       | 1.57700                                  |
| 56.400                       | 1.57600                                  |
| 58.245                       | 1.57525                                  |

*S2.2.8. 1,1,2,2-tetrabromoethane (TBE)*

**Table S31.** Refractive indices at 589 nm of TBE.

| Temperature / °C<br>(±0.001) | Refractive index at<br>589 nm (±0.00001) |
|------------------------------|------------------------------------------|
| 18.870                       | 1.63850                                  |
| 20.618                       | 1.63800                                  |
| 22.386                       | 1.63700                                  |
| 24.187                       | 1.63575                                  |
| 26.025                       | 1.63500                                  |
| 27.841                       | 1.63375                                  |
| 29.666                       | 1.63250                                  |
| 31.484                       | 1.63150                                  |
| 33.274                       | 1.63075                                  |
| 35.074                       | 1.63000                                  |
| 36.915                       | 1.62850                                  |
| 38.718                       | 1.62750                                  |
| 40.537                       | 1.62650                                  |
| 42.302                       | 1.62575                                  |

**Table S32.** Refractive indices at 589 nm of a mixture of 5CB + TBE ( $x_{5CB} = 0.7296$ ).

| Temperature / °C<br>( $\pm 0.001$ ) | Refractive index at<br>589 nm ( $\pm 0.00001$ ) |
|-------------------------------------|-------------------------------------------------|
| 18.818                              | 1.59900                                         |
| 20.674                              | 1.59825                                         |
| 22.483                              | 1.59750                                         |
| 24.340                              | 1.59650                                         |
| 26.175                              | 1.59550                                         |
| 28.054                              | 1.59475                                         |
| 29.860                              | 1.59400                                         |
| 31.725                              | 1.59300                                         |
| 33.599                              | 1.59225                                         |
| 35.479                              | 1.59125                                         |
| 37.302                              | 1.59050                                         |
| 39.064                              | 1.58950                                         |
| 41.034                              | 1.58875                                         |
| 42.693                              | 1.58800                                         |

### S2.2.9. *n*-undecane

**Table S33.** Refractive indices at 589 nm of *n*-undecane.

| Temperature / °C<br>( $\pm 0.001$ ) | Refractive index at<br>589 nm ( $\pm 0.00001$ ) |
|-------------------------------------|-------------------------------------------------|
| 19.020                              | 1.41950                                         |
| 21.300                              | 1.41875                                         |
| 23.280                              | 1.41800                                         |
| 25.150                              | 1.41700                                         |
| 26.850                              | 1.41600                                         |
| 28.620                              | 1.41500                                         |
| 30.520                              | 1.41400                                         |
| 32.240                              | 1.41350                                         |
| 34.040                              | 1.41250                                         |
| 35.900                              | 1.41175                                         |
| 37.750                              | 1.41050                                         |
| 39.700                              | 1.41000                                         |
| 41.800                              | 1.40900                                         |
| 44.000                              | 1.40850                                         |

**Table S34.** Refractive indices at 589 nm of a mixture of 5CB + *n*-undecane ( $x_{5CB} = 0.8471$ ).

| Temperature / °C<br>( $\pm 0.001$ ) | Refractive index at<br>589 nm ( $\pm 0.00001$ ) |
|-------------------------------------|-------------------------------------------------|
| 20.460                              | 1.57150                                         |
| 22.200                              | 1.57100                                         |
| 24.070                              | 1.57000                                         |

**Table S34 continued from previous page**

| Temperature / °C<br>(±0.001) | Refractive index at<br>589 nm (±0.00001) |
|------------------------------|------------------------------------------|
| 25.820                       | 1.56950                                  |
| 27.610                       | 1.56850                                  |
| 29.570                       | 1.56700                                  |
| 31.300                       | 1.56625                                  |
| 33.100                       | 1.56500                                  |
| 34.950                       | 1.56450                                  |
| 36.720                       | 1.56350                                  |
| 38.480                       | 1.56300                                  |
| 40.220                       | 1.56200                                  |

*S2.2.10. 1-undecanol***Table S35.** Refractive indices at 589 nm of 1-undecanol.

| Temperature / °C<br>(±0.001) | Refractive index at<br>589 nm (±0.00001) |
|------------------------------|------------------------------------------|
| 18.791                       | 1.44200                                  |
| 20.705                       | 1.44150                                  |
| 22.470                       | 1.44100                                  |
| 24.295                       | 1.44025                                  |
| 26.146                       | 1.43950                                  |
| 27.948                       | 1.43900                                  |
| 29.764                       | 1.43800                                  |
| 31.620                       | 1.43750                                  |
| 33.480                       | 1.43650                                  |
| 35.324                       | 1.43575                                  |
| 37.108                       | 1.43500                                  |
| 38.954                       | 1.43400                                  |
| 40.761                       | 1.43350                                  |
| 42.583                       | 1.43275                                  |

**Table S36.** Refractive indices at 589 nm of a mixture of 5CB + 1-undecanol ( $x_{5CB} = 0.8261$ ).

| Temperature / °C<br>(±0.001) | Refractive index at<br>589 nm (±0.00001) |
|------------------------------|------------------------------------------|
| 18.930                       | 1.57150                                  |
| 20.704                       | 1.57100                                  |
| 22.531                       | 1.57000                                  |
| 24.295                       | 1.56900                                  |
| 26.147                       | 1.56825                                  |
| 27.988                       | 1.56700                                  |
| 29.829                       | 1.56600                                  |
| 31.692                       | 1.56550                                  |
| 33.556                       | 1.56425                                  |

**Table S36 continued from previous page**

| Temperature / °C<br>(±0.001) | Refractive index at<br>589 nm (±0.00001) |
|------------------------------|------------------------------------------|
| 35.352                       | 1.56350                                  |
| 37.210                       | 1.56250                                  |
| 39.045                       | 1.56150                                  |
| 40.820                       | 1.56075                                  |
| 42.718                       | 1.56000                                  |
